# Supplementary material for: Powerful drying and doping strategies for enhancing the thermoelectric performance of tellurium nanostructures prepared via green hydrothermal synthesis
Source: Royal Society of Chemistry journal article supplement (doi:10.1039/d3se01248d), 2023-11-21
Supplement: d3se01248d1.pdf [file d3se01248d1.pdf]

**Powerful drying and doping strategies for enhancing  
thermoelectric performance of tellurium nanostructures  
prepared via green hydrothermal synthesis**

*In Ho Kim, Yong Jin Jeong\**

*Department of Materials Science and Engineering, Korea National University of  
Transportation, Chungju 27469, Republic of Korea*

**\*Corresponding author : Yong Jin Jeong (Tel: +82-43-841-5383, yjjeong@ut.ac.kr)**

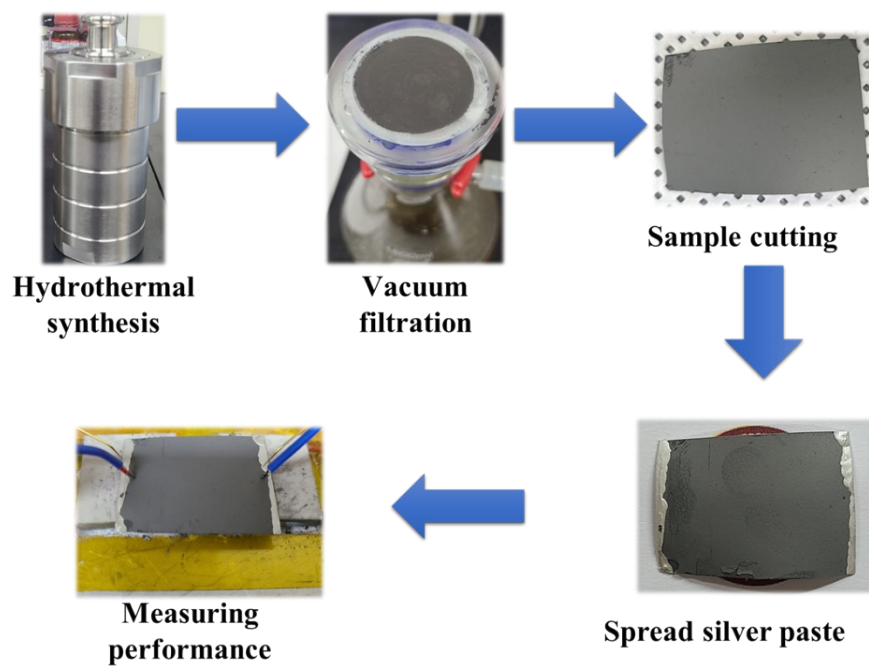

**Figure S1.** Digital images showing the preparation process of thermoelectric samples in this study.

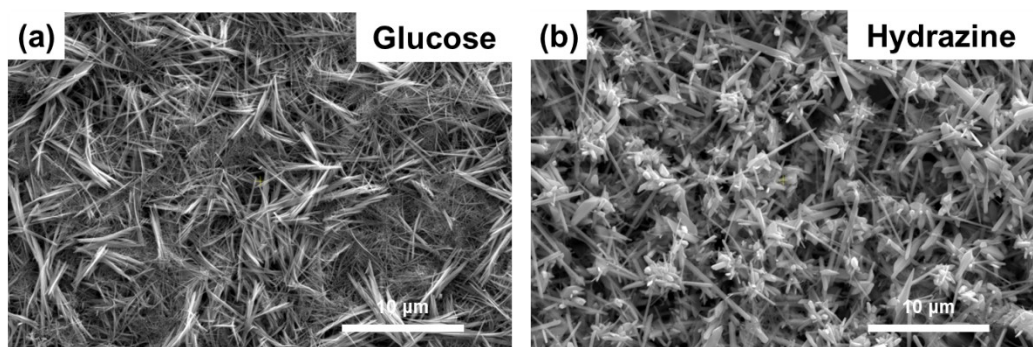

**Figure S2.** SEM images of Te nanostructures synthesized using (a) glucose and (b) hydrazine hydrate at a given synthesis condition.

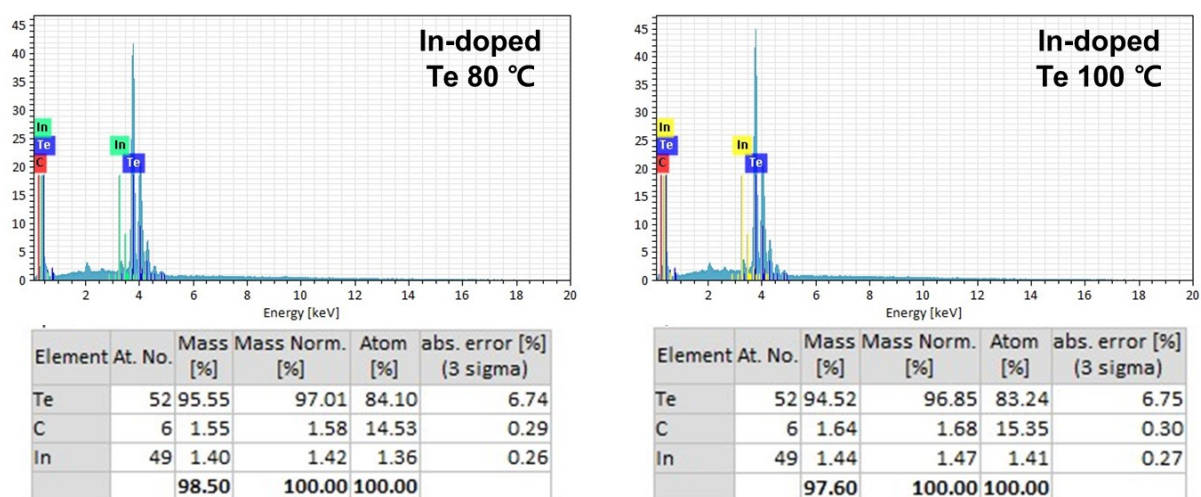

**Figure S3.** DES data plots and Tables of In-doped Te samples from different synthesis temperatures (80 °C/100 °C).

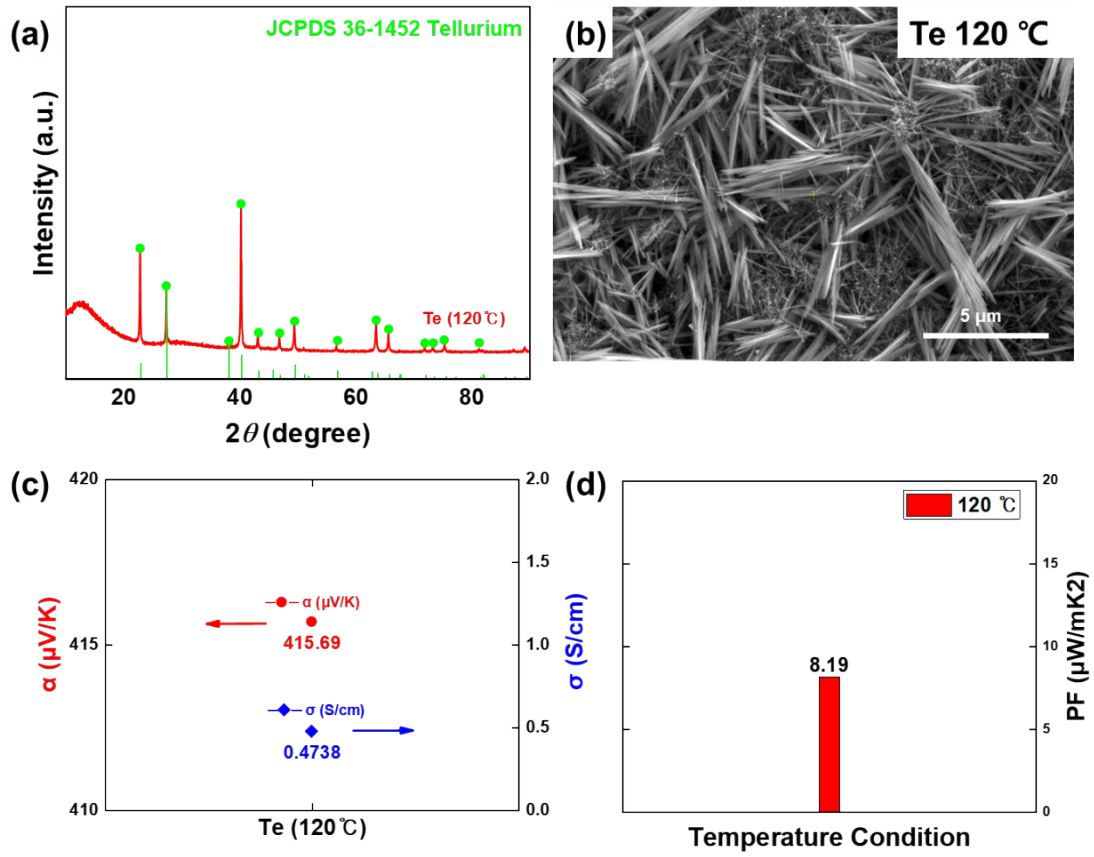

**Figure S4.** (a) XRD pattern spectra and (b) SEM images of Te nanostructures synthesized at 120 °C. Plots showing (c)  $\alpha$  and  $\sigma$  and (d) power factor of Te nanostructure films synthesized at 120 °C.

**Table S1.** Hall effect measurement data for In-doped Te 100 °C

| Sample             | $n$ ( $10^{18} \text{ cm}^{-3}$ ) | $\mu$ ( $\text{cm}^2\text{V}^{-1}\text{S}^{-1}$ ) | $\sigma$ (S/cm) | $R_{\text{H}}$ ( $\text{m}^2/\text{C}$ ) |
|--------------------|-----------------------------------|---------------------------------------------------|-----------------|------------------------------------------|
| In-doped Te 100 °C | 9.613                             | 2.36                                              | 3.633           | 0.0186                                   |

\* $R_{\text{H}}$ : Hall coefficient

Hall coefficient measurement was analyzed using Van der Pauw method with a measurement system (Accent Optical Technologies HL5500PC). Compared to the results of the previous Hall effect analysis of Sn-doped Te sample through the hydrothermal synthesis process,<sup>S1</sup> charge carrier concentration ( $n$ ) was slightly reduced but the mobility ( $\mu$ ) value was increased by 1.19 ( $\text{cm}^2\text{V}^{-1}\text{S}^{-1}$ ), resulting in an improvement in  $\sigma$  of 2.832 (S/cm). In other words, the charge carrier conduction performance was improved by solution-state doping with In, from which it was confirmed that the In acted as a p-type dopant to improve the electrical conduction properties by increasing  $\mu$ .

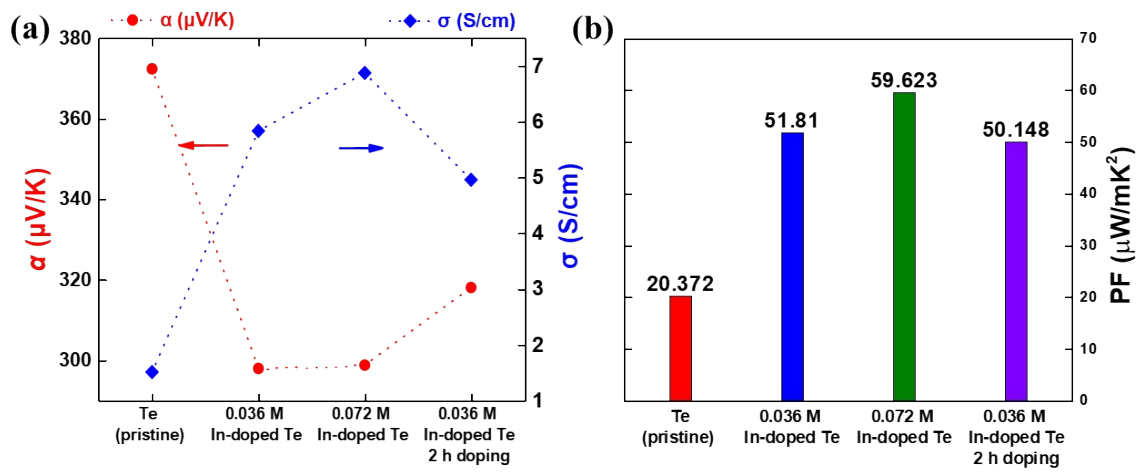

**Figure S5.** (a)  $\alpha$  and  $\sigma$  and (b)  $PF$  of Te nanostructure films depending on the doping conditions.

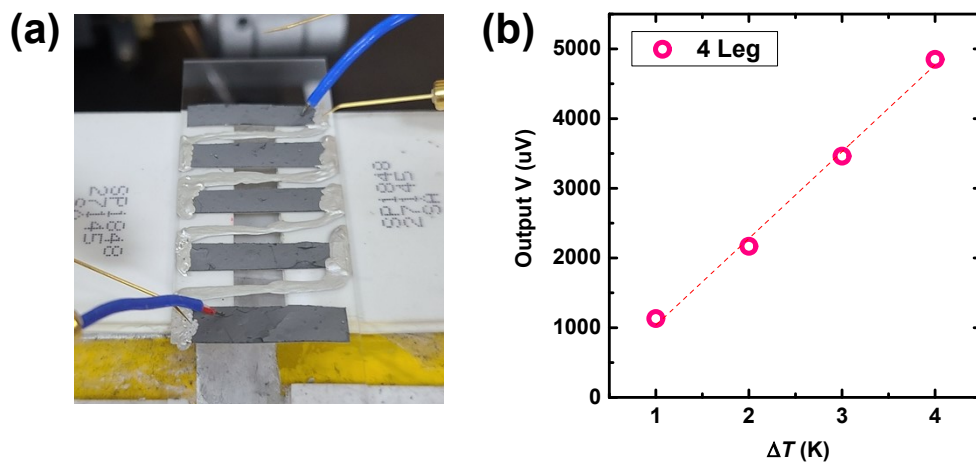

**Figure S6.** (a) Digital image of an as-assembled prototype TEG with the optimized Te nanostructure samples in this study. (b) The output voltage of the TEG depending on temperature difference.

## Reference

S1. P. Sun, C. Li, J. Xu, Q. Jiang, W. Wang, J. Siu, F. Zhao, W. Ding, J. Hou, and F. Jiang, *Sustainable Energy & Fuels*, 2018, **2**, 2636-2643.
